# Supplementary material for: A novel all-in-one conditional knockout system uncovered an essential role of DDX1 in ribosomal RNA processing
Source: PubMed Central journal article supplement — Nucleic Acids Res. 2021 Jan 27;49(7):e40. doi: 10.1093/nar/gkaa1296 (PMC8053084; doi:10.1093/nar/gkaa1296), 2021-01-27
Supplement: gkaa1296_supplemental_file.pdf [file gkaa1296_supplemental_file.pdf]

## SUPPLEMENTARY FIGURE LEGENDS

### Supplementary Figure S1.

CRISPR/Cas9-mediated gene disruption. (A) Schematic of the gene-disruption experiments. (B) Target sequences of CRISPR/Cas9 to *Ddx1*. The filled box indicates the untranslated region, and the open box represents the open reading frame. The CRISPR/Cas9 target sequences are colored in red, and their cleavage sites are indicated by arrowheads. The restriction enzymes used for indel confirmation are shown. (C) Interspecies conservation of DDX1 around the CRISPR/Cas9 target sites. The CR1 and CR2 target sites are indicated. The Q-motifs are shown in orange. (D) In vitro digestion of the substrate sequence by CR1. The left figure shows the expected fragment size when CR1 digests substrate DNA derived from the mouse genomic sequence. (E) The genomic sequence containing the CR1 target site was amplified via PCR using primers described in Supplementary Table S1. The left panel shows the expected fragment size when the amplicons derived from each clone were digested with AluI. A mutation induced by CR1 disrupts the AluI recognition site marked with an asterisk. The clone numbers and genotyping results are shown in the right panel. The largest fragment of the AluI-digested PCR product derived from wild-type and mutant alleles is indicated. C, wild-type control; Wt, wild type; He, heterozygous indel; Ho, homozygous indel. (F) The sequence around the CR1 target site in clone #3. The CR1 target sequence is shown in red, and the cleavage site is indicated by an arrowhead. The AluI recognition sequence is underlined. The shaded sequence represents exon 2 of *Ddx1*. A missense mutation found in one allele of clone 3 is boxed. (G) The genomic sequence containing the CR2 target site was amplified via PCR using primers described in Supplementary Table S1. The left panel shows the expected fragment size when the amplicons derived from each clone were digested with EcoRV. A mutation induced by CR2 disrupts the EcoRV recognition site. The clone numbers and genotyping results are shown in the right panel. The largest fragment of the EcoRV-digested PCR product derived from wild-type and mutant alleles is indicated. C, wild-type control; Wt, wild type; He, heterozygous indel; Ho, homozygous indel. (H) A target sequence of CRISPR/Cas9 in *Slc20a2*. The filled box indicates the untranslated region, and the open box represents the open reading frame. The target sequence of CRISPR/Cas9 is colored in red, and its cleavage site is indicated by an arrowhead. The restriction enzyme used for indel confirmation is shown. (I) The genomic sequence containing the CRISPR/Cas9 target site of *Slc20a2* was amplified via PCR using primers described in Supplementary Table S1. The left panel shows the expected fragment size when the amplicons derived from each clone were digested with SacII. A mutation induced by *Slc20a2*CR disrupts the SacII recognition site. The clone numbers and genotyping results are shown in the right panel. The largest fragment of the SacII-digested PCR product derived from wild-type and mutant alleles is indicated. C, wild-type control; Wt, wild type; He, heterozygous indel; Ho, homozygous indel.

### Supplementary Figure S2.

Details of *Ddx1* targeting. The genomic sequences of wild-type, targeted, and FLPed *Ddx1* around exon 2 are shown. Uppercase and lowercase letters represent exons and introns, respectively. The target sequence of CRISPR/Cas9 is underlined. The arrowhead indicates the cleavage site. The exon 2 sequence upstream and downstream of the cleavage site is colored blue and red, respectively. The inserted sequence (all-in-one unit) of the targeting vector is boxed in red. The EGFP sequence without a stop codon is shown in green with underlining. The inserted residues essential for shifting the reading frame after FLP/FRT recombination are indicated by double underlining. Silent mutations were introduced at the dotted residues of the all-in-one unit to avoid CRISPR/Cas9-mediated cleavage of the inserted sequence.

### Supplementary Figure S3.

Southern blot analysis of TetFE *Ddx1*cKO clones. PCR-verified non-targeted allele-negative clones were analyzed by Southern blotting as in Figure 2D. N, TetFE ESCs. Asterisks indicate F/mut clones with a large indel in the mutant allele. Clone #1 was used as TetFE *Ddx1*<sup>F/F</sup> ESCs in this study.

#### Supplementary Figure S4.

*Ddx1* cKO ESCs. (A) Lv-a2FE-infected *Ddx1* cKO ESCs were sorted and incubated with or without 4OHT for 2 days. The expression of fluorescent proteins was analyzed via flow cytometry. (B) Sorted EGFP<sup>+</sup> (F/F) and EGFP<sup>-</sup> (-/-) cells were cultured for 2 days, and DDX1 expression was analyzed via western blotting. (C) DDX1 expression in *Ddx1*<sup>-/-</sup> ESCs was analyzed by western blotting. The arrow indicates DDX1. The asterisk shows a non-specific band found in both samples. C, control parental ESCs. (D) DDX1 was immunoprecipitated from *Ddx1* cKO cells using anti-FLAG agarose beads, and the associated proteins were detected via silver staining. C, control immunoprecipitation using parental cell lysate.

#### Supplementary Figure S5.

Generation of TetFE ESCs. (A) Modified SIM system for loading multiple genes into the *Gt(ROSA26)Sor* locus. Instead of the Cre/loxP-mediated gene integration method used in the original SIM system, the modified SIM system used an NHEJ-dependent knock-in mechanism catalyzed by the CRISPR/Cas9 vectors TetFE CR1 and TetFE CR2. Arrowheads represent primers used for genomic PCR. (B) Genomic PCR analysis of G418-resistant clones. The sizes of PCR products generated with these primer sets are shown. The upper band represents the targeted allele and the lower band represents the non-targeted allele. C, wild-type control. (C) Expression of fluorescent marker proteins in TetFE ESCs was analyzed via flow cytometry.

#### Supplementary Figure S6.

Generation of various all-in-one conditional gene knockout TetFE ESCs. EGFP-positive clones identified by fluorescence microscopy were picked up for characterization. (A) Targeting strategy for *Hnrnpk*. Arrowheads represent primers used for genomic PCR. The probe position used for Southern blotting is depicted in the figure. X, XcmI recognition site. (B) Genomic PCR analysis of the targeted clones. The sizes of PCR products generated with these primer sets are shown. The upper band represents the non-targeted allele and the lower band represents the targeted allele. C, wild-type control. (C) XcmI-digested genomic DNA of clones #1 and #2 was analyzed by Southern blotting. C, wild-type control. The expected fragment sizes of the non-targeted and targeted alleles are 3.8 and 4.8 kb, respectively. Clone #2 was used as *Hnrnpk*<sup>F/F</sup> ESCs. (D) HNRNPK expression in *Hnrnpk*<sup>F/F</sup> ESCs was analyzed via western blotting. (E) Expression of *Hnrnpk* mRNA in *Hnrnpk*<sup>F/F</sup> cells was analyzed by quantitative RT-PCR (n = 3; NS, not significant). (F) The purity of the sorted *Hnrnpk*<sup>F/F</sup> and *Hnrnpk*<sup>-/-</sup> cells was analyzed via flow cytometry on day 1. (G) The expression of HNRNPK protein in the sorted cells was analyzed via western blotting. Cells were harvested on day 1. (H) Targeting strategy for *Rtraf*. Arrowheads represent primers used for genomic PCR. The probe position used for Southern blotting is depicted in the figure. N, NdeI recognition site. (I) Genomic PCR analysis of the targeted clones. The sizes of PCR products generated with these primer sets are shown. The upper band represents the targeted allele, and the lower band represents the non-targeted allele. C, wild-type control. (J) NdeI-digested genomic DNA of clones #2 and #3 was analyzed by Southern blotting. C, wild-type control. The expected fragment sizes of the non-targeted and targeted alleles are 4.3 and 5.4 kb, respectively. Note clone #2 had a large indel in one allele. Clone #3 was used as *Rtraf*<sup>F/F</sup> ESCs. (K) RTRAF expression in *Rtraf*<sup>F/F</sup> ESCs was analyzed via western blotting. (L) Expression of *Rtraf* mRNA in *Rtraf*<sup>F/F</sup> cells was analyzed by quantitative RT-PCR (n = 3; \*\* P<0.01). (M) The purity

of the sorted *Rtraf<sup>F/F</sup>* and *Rtraf<sup>-/-</sup>* cells was analyzed via flow cytometry on day 2. (N) RTRAF expression in the sorted cells was analyzed via western blotting. Cells were harvested on day 2. (O) Targeting strategy for *Ddx39*. Arrowheads represent primers used for genomic PCR. (P) Genomic PCR analysis of the targeted clones. The sizes of PCR products generated with these primer sets are shown. The upper band represents the targeted allele, and the lower band represents non-targeted allele. C, wild-type control. (Q) The sequences around the CR target site in the three clones were analyzed. The CR target sequence is shown in red, and the cleavage site is indicated by an arrowhead. Clone #1 was used as *Ddx39<sup>F/mut</sup>* ESCs. (R) DDX39 expression in *Ddx39<sup>F/mut</sup>* ESCs was analyzed via western blotting. The arrowhead indicates FLAG-DDX39. Note that the anti-DDX39 antibody recognizes both DDX39 and the highly conserved paralogous protein DDX39B. The lower band detected by this antibody contains endogenous DDX39B and/or DDX39. Note that *Ddx39<sup>F/mut</sup>* ESCs express less DDX39 than parental cells due to loss of *Ddx39* expression from the mutated allele. (S) The purity of the sorted *Ddx39<sup>F/mut</sup>* and *Ddx39<sup>-/-</sup>* ESCs was analyzed via flow cytometry on day 2. (T) DDX39 expression in the sorted cells was analyzed via western blotting. Cells were harvested on day 2. The arrowhead indicates FLAG-DDX39.

### Supplementary Figure S7.

All-in-one cKO in HT1080 cells. (A) Targeting strategy for *DDX1*. Arrowheads represent primers used for genomic PCR. The probe position used for Southern blotting is depicted in the figure. N, NdeI recognition site. (B) Genomic PCR analysis of the targeted clones. The sizes of PCR products generated with these primer sets are shown. The upper band represents the targeted allele and the lower band represents the non-targeted allele. C, wild-type control. (C) Genomic DNA of PCR-verified non-targeted allele-negative clones was digested with NdeI for Southern blotting. C, wild-type control. The expected fragment sizes of non-targeted and targeted alleles are 5.3 and 6.3 kb, respectively. (D) DDX1 expression in *DDX1* cKO HT1080 cells was analyzed via western blotting. (E) Expression of *DDX1* mRNA in *DDX1<sup>F/F</sup>* cells was analyzed by quantitative RT-PCR (n = 3; \* P<0.05). (F) *DDX1<sup>F/F</sup>* cells were transiently transfected with the codon-optimized FLP expression vector, and *DDX1<sup>F/F</sup>* and *DDX1<sup>-/-</sup>* cells were sorted based on EGFP expression. The purity of sorted *DDX1<sup>F/F</sup>* and *DDX1<sup>-/-</sup>* cells was analyzed by flow cytometry on day 1. (G) Expression of DDX1 protein in sorted cells was analyzed via western blotting. Cells were harvested on day 1. (H) Targeting strategy for *HNRNPK*. Arrowheads represent primers used for genomic PCR. The probe position used for Southern blotting is depicted in the figure. B, BsoBI recognition site. (I) Genomic PCR analysis of the targeted clones. The sizes of PCR products generated with these primer sets are shown. The upper band represents the targeted allele and the lower band represents the non-targeted allele. Asterisks indicate clones with a slightly higher targeted allele signal. Sequencing analysis of these clones revealed partial duplication of the right homology arm sequence in the targeted allele. They were considered to be non-targeted clones. C, wild-type control. (J) Genomic DNA of PCR-verified non-targeted allele-negative clones was digested with BsoBI for Southern blotting. C, wild-type control. The expected fragment sizes of non-targeted and targeted allele are 4.2 and 5.2 kb, respectively. (K) HNRNPK expression in *HNRNPK* cKO HT1080 cells was analyzed via western blotting. (L) Expression of *HNRNPK* mRNA in *HNRNPK<sup>F/F</sup>* cells was analyzed by quantitative RT-PCR (n = 3; NS, not significant). (M) *HNRNPK<sup>F/F</sup>* cells were transiently transfected with the codon-optimized FLP expression vector, and *HNRNPK<sup>F/F</sup>* and *HNRNPK<sup>-/-</sup>* cells were sorted based on EGFP expression. The purity of sorted *HNRNPK<sup>F/F</sup>* and *HNRNPK<sup>-/-</sup>* cells was analyzed by flow cytometry on day 1. (N) Expression of HNRNPK protein in sorted cells was analyzed via western blotting. Cells were harvested on day 1.

Fig.S1 Suzuki et al.

A

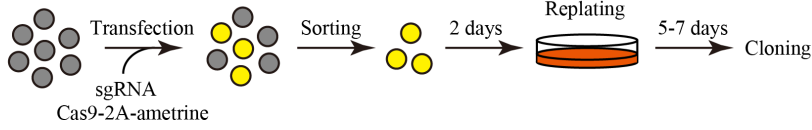

B

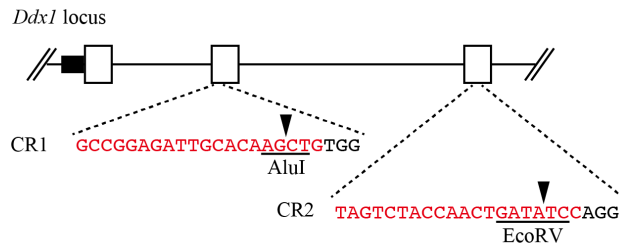

C

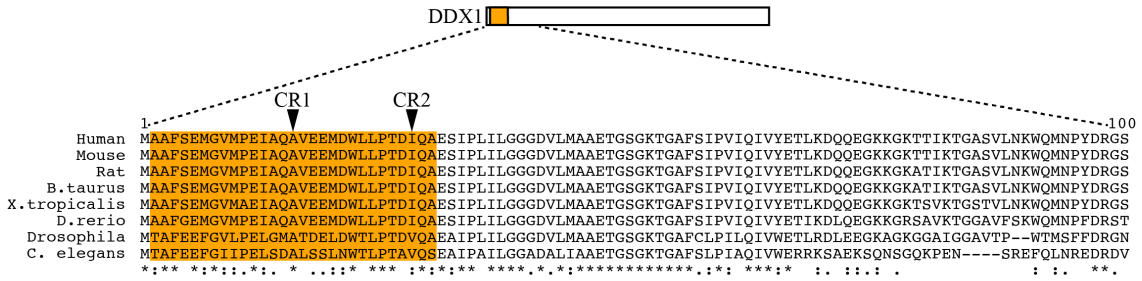

D

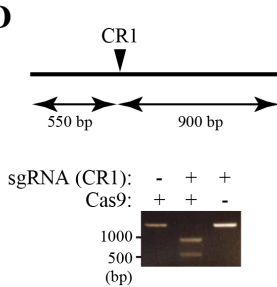

E

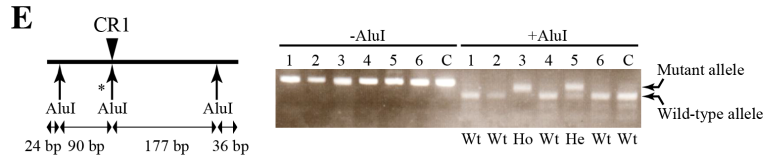

F

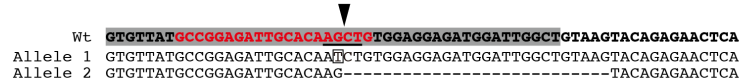

G

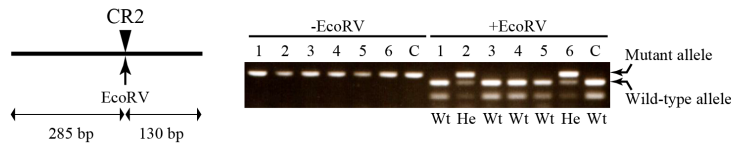

H

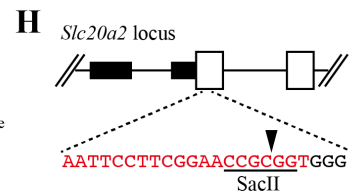

I

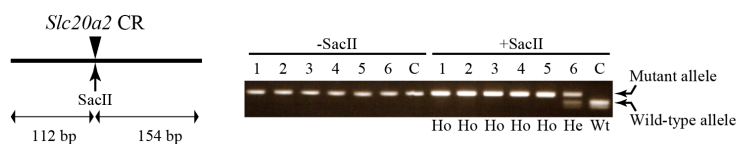

Fig.S2 Suzuki et al.

Wt allele

aatgacttttttccctccag AA ATG GGT GTT ATG CCG GAG ATT GCA CAA GCT GTG GAG GAG ATG GAT TGG CT gtaagtacagagaactcaggt  
 E M G V M P E I A Q A V E E M D W L

Exon2

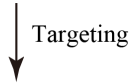

Targeted allele

All-in-one unit

aatgacttttttccctccag AA ATG GGT GTT ATG CCG GAG ATT GCA CAA GGC ATG GAA GTT CCT ATT CCG AAG TTC CTA TTC TCT gtaagtacagagaactcaggt  
 E M G V M P E I A Q G M E V P I P K F L F S

FRT

AGA AAG TAT AGG AAC TTC ATG GTC TCC AAG GGC GAG GAG CTG TTC ACC GGG GTG GTG CCC ATC CTG GTC GAG CTG GAC GGC  
 R K Y R N F M V S K G E E L F T G V V P I L V E L D G

GAC GTC AAC GGC CAC AAG TTC AGC GTG TCC GGC GAG GGC GAT GCC ACC TAC GGC AAG CTG ACC CTG AAG TTC ATC  
 D V N G H K F S V S G E E G D A T Y G K L T L K F I

TGC ACC ACC GGC AAG CTG CCC GTG CCC TGG CCC ACC CTC GTG ACC ACC CTG ACC TAC GGC GTG CAG TGC TTC AGC CGC TAC  
 C T T G K L P V P W P T L V T T L T Y G V Q C F S R Y

CCC GAC CAC ATG AAG CAG CAC GAC TTC TTC AAG TCC GCC ATG CCC GAA GGC TAC GTC CAG GAG CGC ACC ATC TTC TTC AAG  
 P D H M K Q H D F F K S A M P E G Y V Q E R T I F F K

GAC GAC GGC AAC TAC AAG ACC CGC GCC GAA GTC AAG TTC GAG GGC GAC ACC CTG GTG AAC CGC ATC GAG CTG AAG GGC ATC  
 D D G G N Y K T R A E V K F E G D T L V N R I E L K G I

GAC TTC AAG GAG GAC GGC AAC ATC CTG GGG CAC AAG CTG GAG TAC AAC TAC AAC AGC CAC AAC GTC TAT ATC ATG GCC GAC  
 D F K E D G N I L G H K L E Y N Y N S H N V Y I M A D

AAG CAG AAG AAC GGC ATC AAA GTC AAC TTC AAG ATC CGC CAC AAC ATC GAG GAC GGC AGC GTG CAG CTC GCC GAC CAC TAC  
 K Q K N G I K V N F K I R H N I E D G S V Q L A D H Y

CAG CAG AAC ACC CCC ATC GGC GAC GGC CCC GTG CTG CTG CCC GAC AAC CAC TAC CTG AGC ACC CAG TCC GCC CTG AGC AAA  
 Q Q N T P I G D G P V L L P D N H Y L S T Q S A L S K

GAC CCC AAC GAG AAG CGC GAT CAC ATG GTC CTG CTG GAG TTC GTG ACC GCC GCC GGG ATC ACT CTC GGC ATG GAC GAG CTG  
 D P N E K R D H M V L L E F V T A A G I T L G M D E L

TAC CTG AAG TTC CTA TTC CGA AGT TCC TAT TCT CTA GAA AGT ATA GGA ACT TCA GGA AGC GGA GCT ACT AAC TTC AGC CTG  
 Y L K F L F R S S Y S L E S I G T S G S G A T N F S L

FRT

CTG AAG CAG GCT GGA GAC GTG GAG GAG AAC CCT GGA CCT ATG GAC TAC AAA GAC CAT GAC GGC GAT TAT AAA GAT CAT GAT  
 L K Q A G D V E E N P G P M D Y K D H D G D Y K D H D

FLAG

ATC GAT TAC AAG GAT GAC GAT GAC AAG ATG GCG GCC TTC TCC GAA ATG GGT GTT ATG CCG GAG ATC GCT CAG GCT GTG GAG  
 I D Y K D D D D K M A A F S E M G V M P E I A Q A V E

Exon1 sequence — 5' part of Exon2 sequence

GAG ATG GAT TGG CT gtaagtacagagaactcaggt  
 E M D W L

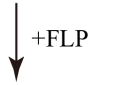

FLPed allele

aatgacttttttccctccag AA ATG GGT GTT ATG CCG GAG ATT GCA CAA GGC ATG GAA GTT CCT ATT CCG AAG TTC CTA TTC TCT gtaagtacagagaactcaggt  
 E M G V M P E I A Q G M E V P I P K F L F S

FRT

AGA AAG TAT AGG AAC TTC AAG AAG CGG AGC TAC TAA CTT CAG CCT GCT GAA GCA GGC TGG AGA CGT GGA GGA GAA CCC TGG  
 R K Y R N F R K R S Y \*

ACC TAT GGA CTA CAA AGA CCA TGA CGG CGA TTA TAA AGA TCA TGA TAT CGA TTA CAA GGA TGA CGA TGA CAA GAT GGC GGC

CTT CTC CGA AAT GGG TGT TAT GCC GGA GAT CGC TCA GGC TGT GGA GGA GAT GGA TTG GCT gtaagtacagagaactcaggt

**Fig.S3 Suzuki et al.**

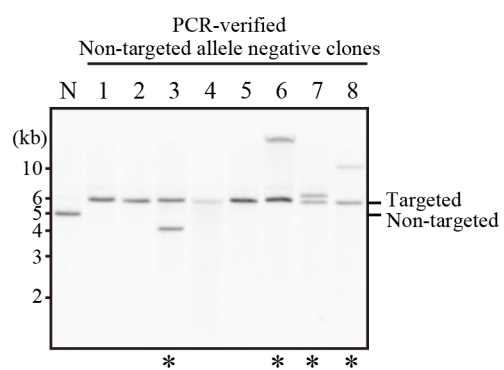

Fig.S4 Suzuki et al.

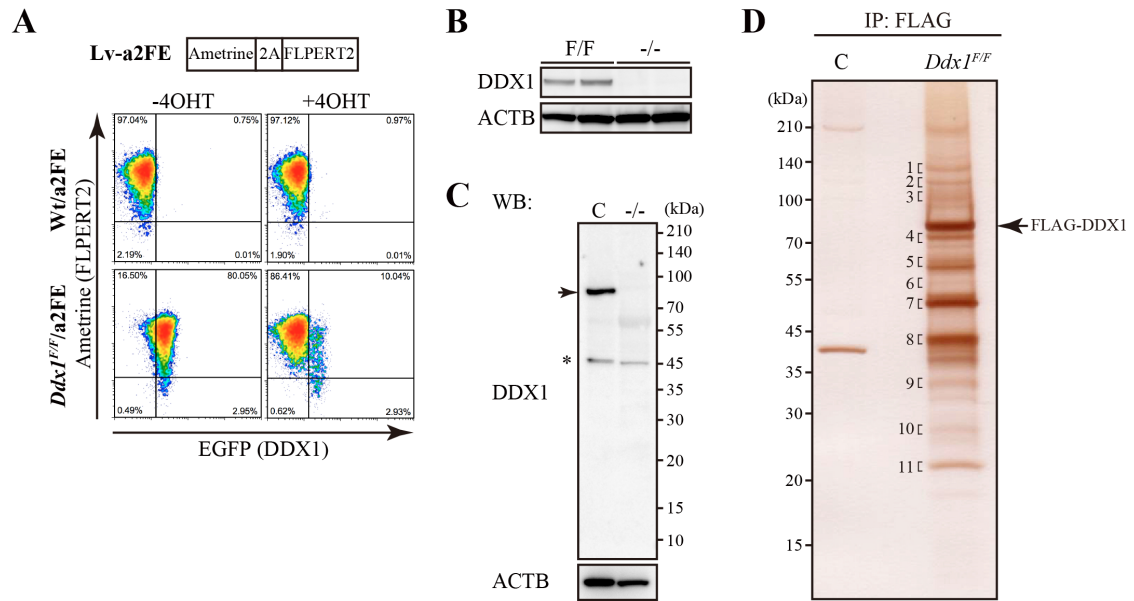

**Fig.S5 Suzuki et al.**

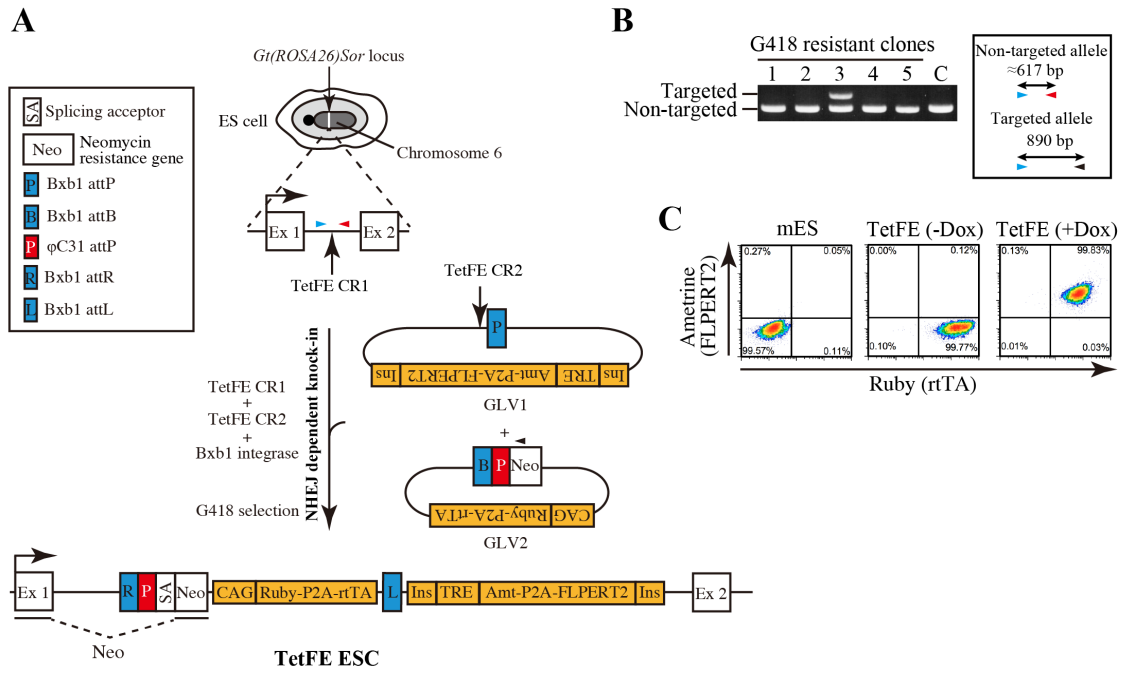



Fig.S6 Suzuki et al.

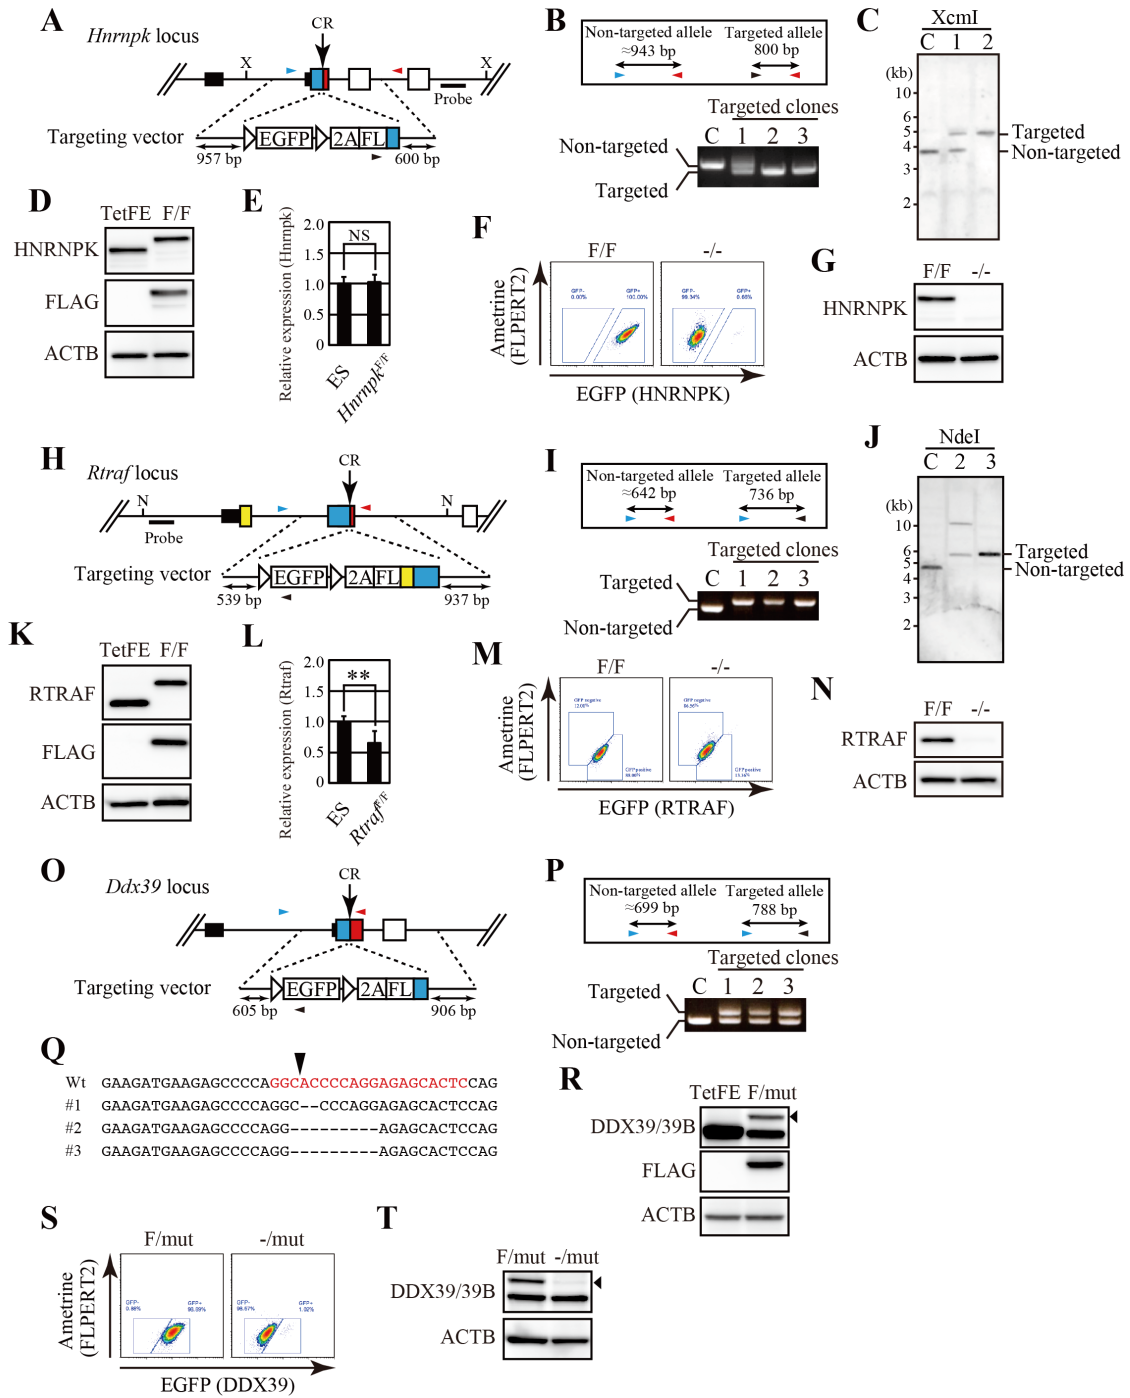

**Fig.S7 Suzuki et al.**

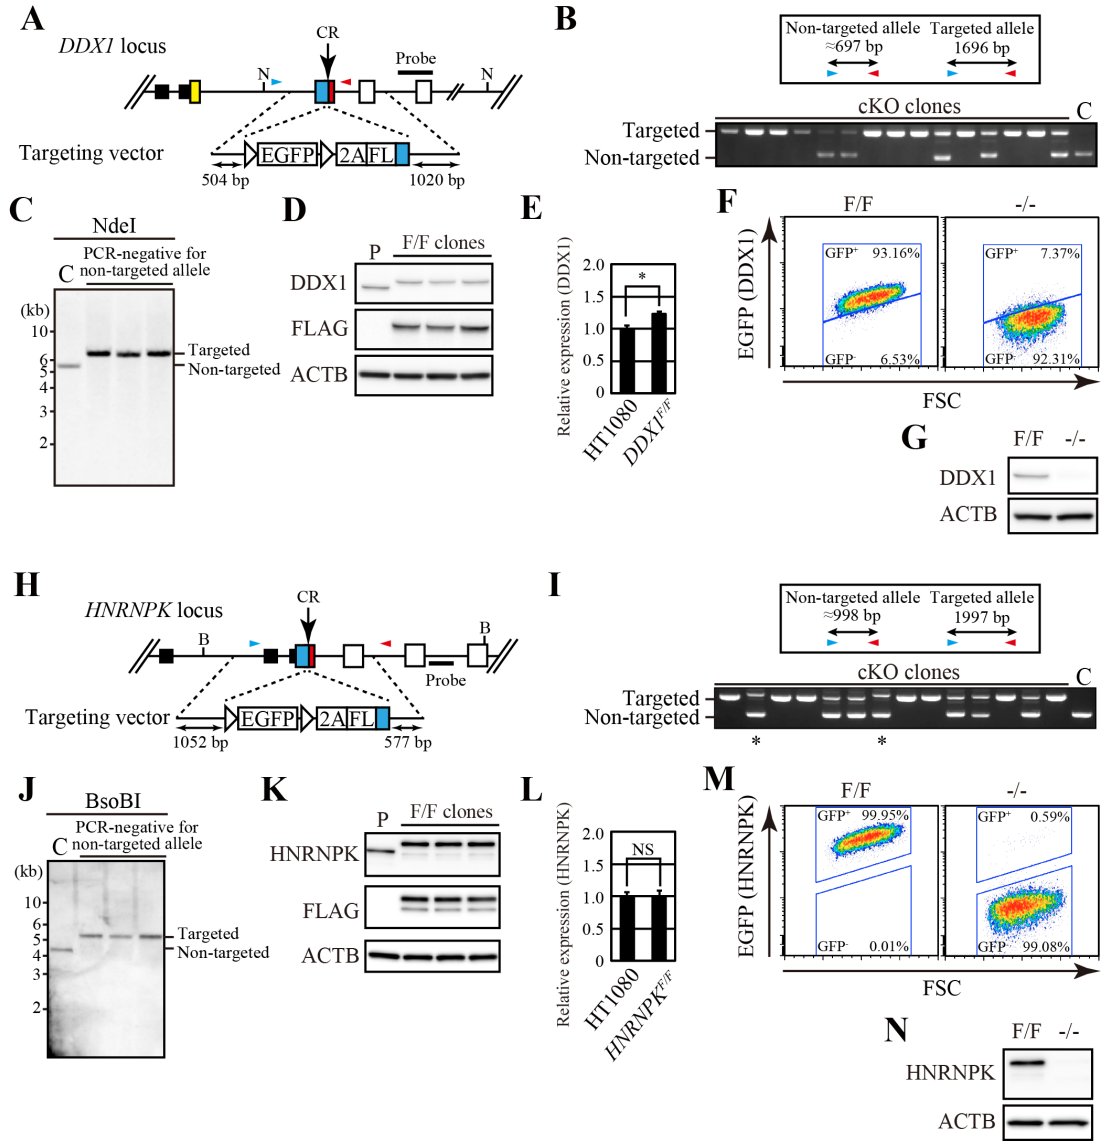

**Supplementary Table S1. Primer sequences.**

|                                                       | <b>Primer sequence (5' to 3')</b>   |
|-------------------------------------------------------|-------------------------------------|
| Ddx1 cKO typing (5' junction)                         | TAGCAACATTTTGGCTATGGCTGTC           |
|                                                       | GTCACAATTGCACCTGAGTTCTCTGTACTTACAGC |
|                                                       | CTCGCCGGACACGCTGAACTTGT             |
| Ddx1 cKO typing (3' junction)                         | CAGCCTTGGAGAGAACTTAAATCTG           |
|                                                       | ATCGATTACAAGGATGACGATGAC            |
|                                                       | CTTGACTAGCTAACTTTACGTCAAGTG         |
| Hnrnpk cKO typing                                     | ACTACCGGCAGTTCTGAAATCTGC            |
|                                                       | ATCGATTACAAGGATGACGATGAC            |
|                                                       | ACTACTGTAGCACTAGGATGTCAC            |
| Rtraf cKO typing                                      | CGTCCCGGTAACGTACTACTG               |
|                                                       | CAACGTTTACAAAAGTTCTCTGTGC           |
|                                                       | CTCGCCGGACACGCTGAACTTGT             |
| Ddx39 cKO typing                                      | CCTTCTCAACACCAAGGCAGGTAC            |
|                                                       | TGGAGACATAAGATCCTTTGACATC           |
|                                                       | CTCGCCGGACACGCTGAACTTGT             |
| TetFE typing                                          | GTTGCAATACCTTCTGGGAGTTC             |
|                                                       | GGAAAATGCCAATGCTCTGTCTAG            |
|                                                       | CGCCTTGAGCCTGGCGAACA                |
| DDX1 typing                                           | AGTTAAGAACTCAGCAGTTCTTCAG           |
|                                                       | CCAGGTACATTTAGGCTTTATGTAC           |
| HNRNPK typing                                         | GTTCAAATCAGTATTCAGTGTGATCG          |
|                                                       | ACCAGAGCCTTCAAGTCTGTTTAG            |
| Ddx1 probe for Southern blotting                      | AAAGAAACCAAAGGACATAGC               |
|                                                       | GAGAGGTTTTTAATTTCCCTTACTAGAG        |
| Hnrnpk probe for Southern blotting                    | CAGTTTGCAACATGGAGCTCATG             |
|                                                       | GGTAGACACAAAACCTGTCATGAC            |
| Rtraf probe for Southern blotting                     | CCTGTGCATGTGATTAAAGCCAGATG          |
|                                                       | TGTCCCAAACAGTGAAGTCAG               |
| DDX1 probe for Southern blotting                      | GAATATCAGCAAAACAGCGAATAG            |
|                                                       | CTTACACCAGTTTGGCCACT                |
| HNRNPK probe for Southern blotting                    | ACTACTACACGAGCAGCTTCAG              |
|                                                       | AGCCAAGTCCTATAAATGTGCTCAC           |
| Ddx1 target site amplification (for CR1)              | TTTGCCCCAGTTCTGTGGAAGC              |
|                                                       | ACAAAATTGTATGTGGCAATCCAGCC          |
| Ddx1 target site amplification (for CR2)              | GTACAGAGAACTCAGGTGCAATTGTGAC        |
|                                                       | AGCATTTCCACTCTTAAGTGTC              |
| Substrate amplification for in vitro digestion by CR1 | GAGATCGTCTTAGACTAGCCAAGACAG         |
|                                                       | GATTCTTGTGTATTGGGTCAACACTCC         |
| Slc20a2 target site amplification                     | CCAAAATGGCCATGGACGGGTATC            |
|                                                       | TAGCGTTTCCACGGTCTCGTTGTAG           |
| Cdkn1a qRT-PCR                                        | AGATCCACAGCGATATCCAGAC              |
|                                                       | ACCGAAGAGACAACGGCACACT              |
| Perp qRT-PCR                                          | GCCAGAGCCTCATGGAGTAC                |
|                                                       | GGCCTCCAATGACTCTCAGG                |
| Fas qRT-PCR                                           | CCTGAATCTAGAACCCTCCAGTCG            |
|                                                       | CCTGGATTGTCATGCTTTCAGC              |
| Pmaip qRT-PCR                                         | TGGAGTGCACCGGACATAAC                |
|                                                       | CAATCCTCCGGAGTTGAGCA                |
| Plk2 qRT-PCR                                          | ACAACAAAGTCTACGCTGCA                |
|                                                       | GGTGCAGTAGTCTGTGAAGCT               |

|                |                        |
|----------------|------------------------|
| Mdm2 qRT-PCR   | GCACCTCACAGATTCCAGCT   |
|                | GCGCTCCAACGGACTTTAAC   |
| Rpl11 qRT-PCR  | ATGGCGCAAGATCAAGGGG    |
|                | GACTGTGCAGTGAACAGCAAT  |
| Ddx1 qRT-PCR   | AGTGCTCAACAAGTGGCAGA   |
|                | TGCTCTGACAACACAGACCA   |
| Hnrnpk qRT-PCR | AAATCATCCCTACCTTGGAAGA |
|                | TTTAAGCATTCCACAGCATCAG |
| Rtraf qRT-PCR  | CTCCTTCAGATTCAGCGTCAT  |
|                | CATCCTGTGTTAGACGTTCT   |
| DDX1 qRT-PCR   | GTCAAATCACAGCACTCAGGTA |
|                | CCGGGAAGGTTCAACAATGA   |
| HNRNPK qRT-PCR | TCGAATCTGATGCTGTGGAATG |
|                | CCTCCTGCTAGACTCTGATGAA |
| Gapdh qRT-PCR  | AATGTGTCCGTCGTGGATCTGA |
|                | GATGCCTGCTTACCACCTTCT  |

**Supplementary Table S2. CRISPR/Cas9-mediated gene disruption.**

| Target gene       | Cells  | Analyzed clones | Indel    |        |      | ND |
|-------------------|--------|-----------------|----------|--------|------|----|
|                   |        |                 | No indel | Hetero | Homo |    |
| <i>Ddx1</i> (CR1) | ES     | 31              | 28       | 2      | 1*   | 0  |
|                   | NIH3T3 | 18              | 14       | 4      | 0    | 0  |
|                   | B16F10 | 10              | 10       | 0      | 0    | 0  |
| <i>Ddx1</i> (CR2) | ES     | 23              | 14       | 9      | 0    | 0  |
| <i>Slc20a2</i>    | ES     | 24              | 3        | 1      | 19   | 1  |

ND, PCR product was not detected.

\* The clone represents a missense mutation in one allele.

**Supplementary Table S3. Analysis of targeted allele positive clones**

|                                 | Clone number | Genome PCR <sup>a</sup> | Non-targeted allele                 | Indel                                                    |
|---------------------------------|--------------|-------------------------|-------------------------------------|----------------------------------------------------------|
| <b>Ddx1</b><br>(No selection)   | 1            | T/N                     | In-frame mutation                   | 21 bp deletion                                           |
|                                 | 2            | T                       |                                     |                                                          |
|                                 | 3            | T                       |                                     |                                                          |
|                                 | 4            | T                       |                                     |                                                          |
|                                 | 5            | T                       |                                     |                                                          |
|                                 | 6            | T/N                     | Exon/intron destruction             | 108 bp deletion including intron/exon junction of exon 2 |
|                                 | 7            | T                       |                                     |                                                          |
|                                 | 8            | T                       |                                     |                                                          |
|                                 | 9            | T                       |                                     |                                                          |
|                                 | 10           | T                       |                                     |                                                          |
|                                 | 11           | T/N                     | In-frame mutation                   | 21 bp deletion                                           |
|                                 | 12           | T/N                     | Frame-shift mutation                | 8 bp deletion                                            |
|                                 | 13           | T                       |                                     |                                                          |
| <b>Rtraf</b><br>(no selection)  | 1            | T/N                     | Frame-shift mutation                | 1 bp insertion                                           |
|                                 | 2            | T                       |                                     |                                                          |
|                                 | 3            | T                       |                                     |                                                          |
|                                 | 4            | T                       |                                     |                                                          |
|                                 | 5            | T/N                     | Exon/intron destruction             | 247 bp deletion                                          |
|                                 | 6            | T/N                     | In-frame mutation                   | 1 bp deletion and 1 bp insertion                         |
| <b>Ddx39</b><br>(no selection)  | 1            | T/N                     | In-frame mutation                   | 9 bp del                                                 |
|                                 | 2            | T/N                     | Misc                                | Mixture of 2 clones                                      |
|                                 | 3            | T/N                     | In-frame mutation                   | 9 bp del                                                 |
| <b>Hnrnpk</b><br>(no selection) | 1            | T/N                     | In-frame mutation                   | 6bp deletion                                             |
| <b>Ddx1</b><br>(GFP sorted)     | 1            | T/N                     | In-frame mutation                   | 3 bp deletion                                            |
|                                 | 2            | T/N                     | In-frame mutation                   | 3 bp deletion                                            |
|                                 | 3            | T/N                     | Frame-shift mutation                | 46 bp deletion                                           |
|                                 | 4            | T/N                     | In-frame mutation                   | 3 bp deletion                                            |
|                                 | 5            | T/N                     | Frame-shift mutation                | 1 bp deletion                                            |
|                                 | 6            | T                       |                                     |                                                          |
|                                 | 7            | T/N                     | In-frame stop codon in inserted seq | 5 bp deletion and 428 bp insertion                       |
|                                 | 8            | T                       |                                     |                                                          |
|                                 | 9            | T                       |                                     |                                                          |
|                                 | 10           | T/N                     | Frame-shift mutation                | 3bp deltion and 2bp insertion                            |
|                                 | 11           | T                       |                                     |                                                          |
|                                 | 12           | T                       |                                     |                                                          |
|                                 | 13           | T                       |                                     |                                                          |
|                                 | 14           | T/N                     | Frame-shift mutation                | 1 bp deletion                                            |

|                                      |    |     |                         |                                                                           |
|--------------------------------------|----|-----|-------------------------|---------------------------------------------------------------------------|
|                                      | 15 | T/N | Frame-shift mutation    | 1 bp deletion                                                             |
|                                      | 16 | T   |                         |                                                                           |
|                                      | 17 | T   |                         |                                                                           |
|                                      | 18 | T   |                         |                                                                           |
| <b>Hhrnpk<br/>(GFP sorted)</b>       | 1  | T   |                         |                                                                           |
|                                      | 2  | T   |                         |                                                                           |
|                                      | 3  | T   |                         |                                                                           |
|                                      | 4  | T/N | In-frame mutation       | 9bp deletion                                                              |
|                                      | 5  | T   |                         |                                                                           |
|                                      | 6  | T   |                         |                                                                           |
|                                      | 7  | T/N | In-frame mutation       | 6bp deletion                                                              |
|                                      | 8  | T/N | In-frame mutation       | 9bp deletion                                                              |
| <b>Human DDX1<br/>(GFP sorted)</b>   | 1  | T   |                         |                                                                           |
|                                      | 2  | T   |                         |                                                                           |
|                                      | 3  | T   |                         |                                                                           |
|                                      | 4  | T   |                         |                                                                           |
|                                      | 5  | T/N | Frame-shift mutation    | 44 bp deletion                                                            |
|                                      | 6  | T/N | Frame-shift mutation    | 44 bp deletion                                                            |
|                                      | 7  | T   |                         |                                                                           |
|                                      | 8  | T   |                         |                                                                           |
|                                      | 9  | T   |                         |                                                                           |
|                                      | 10 | T/N | Exon/intron destruction | 4 bp insertion + 104 bp deletion including intron/exon junction of exon 3 |
|                                      | 11 | T   |                         |                                                                           |
|                                      | 12 | T/N | Frame-shift mutation    | 44 bp deletion                                                            |
|                                      | 13 | T   |                         |                                                                           |
|                                      | 14 | T   |                         |                                                                           |
|                                      | 15 | T/N | Frame-shift mutation    | 25 bp deletion                                                            |
|                                      | 16 | T/N | Frame-shift mutation    | 44 bp deletion                                                            |
|                                      | 17 | T   |                         |                                                                           |
|                                      | 18 | T/N | Wild-type               | No indel                                                                  |
|                                      | 19 | T   |                         |                                                                           |
|                                      | 20 | T/N | Exon/intron destruction | 118 bp deletion including intron/exon junction of exon 3                  |
|                                      | 21 | T   |                         |                                                                           |
|                                      | 22 | T   |                         |                                                                           |
|                                      | 23 | T   |                         |                                                                           |
|                                      | 24 | T   |                         |                                                                           |
| <b>Human HNRNPK<br/>(GFP sorted)</b> | 1  | T   |                         |                                                                           |
|                                      | 2  | T   |                         |                                                                           |
|                                      | 3  | T   |                         |                                                                           |
|                                      | 4  | T/N | Exon/intron destruction | 23 bp del including exon/intron junction of exon 3                        |
|                                      | 5  | T/N | Exon/intron destruction | 23 bp del including exon/intron junction of exon 3                        |
|                                      | 6  | T   |                         |                                                                           |
|                                      | 7  | T   |                         |                                                                           |
|                                      | 8  | T/N | Exon/intron destruction | 21 bp deletion + 1 bp insertion including exon/intron junction of exon 3  |
|                                      | 9  | T/N | Exon/intron             | 82 bp deletion + 2 bp insertion                                           |

|           |     |                         |             |                                                                                        |
|-----------|-----|-------------------------|-------------|----------------------------------------------------------------------------------------|
|           |     |                         | destruction | including exon/intron junction of exon 3                                               |
| <b>10</b> | T   |                         |             |                                                                                        |
| <b>11</b> | T/N | Exon/intron destruction |             | 23 bp del including ex/int junction of exon 3 including exon/intron junction of exon 3 |
| <b>12</b> | T   |                         |             |                                                                                        |
| <b>13</b> | T/N | Exon/intron destruction |             | 23 bp del including ex/int junction of exon 3 including exon/intron junction of exon 3 |
| <b>14</b> | T   |                         |             |                                                                                        |
| <b>15</b> | T   |                         |             |                                                                                        |
| <b>16</b> | T/N | Exon/intron destruction |             | 23 bp del including ex/int junction of exon 3 including exon/intron junction of exon 3 |
| <b>17</b> | T/N | Exon/intron destruction |             | 26 bp del including ex/int junction of exon 3 including exon/intron junction of exon 3 |
| <b>18</b> | T   |                         |             |                                                                                        |
| <b>19</b> | T   |                         |             |                                                                                        |
| <b>20</b> | T   |                         |             |                                                                                        |
| <b>21</b> | T/N | Exon/intron destruction |             | 82 bp deletion + 2 bp insertion including ex/int junction of exon 3                    |
| <b>22</b> | T/N | Exon/intron destruction |             | 23 bp del including ex/int junction of exon 3 including ex/int junction of exon 3      |

*a*, Targeted allele positive clones were analyzed by 3 primer PCR. Non-targeted alleles were analyzed by sequencing. T, targeted allele signal only; T/N, both targeted and non-targeted allele signal



**Supplementary Table S4. DDX1-associated proteins.**

| <b>Band</b> | <b>Gene name</b> | <b>Accession number</b> | <b>Non-redundant peptides<br/>(confidence&gt;95%)</b> |
|-------------|------------------|-------------------------|-------------------------------------------------------|
| <b>1</b>    | <i>Dhx9</i>      | O70133                  | 3                                                     |
| <b>2</b>    | <i>Dhx30</i>     | Q99PU8                  | 2                                                     |
| <b>3</b>    | <i>Hnrnpu</i>    | Q8VEK3                  | 3                                                     |
| <b>4</b>    | <i>Prmt5</i>     | Q8CIG8                  | 3                                                     |
|             | <i>Riok1</i>     | Q922Q2                  | 3                                                     |
| <b>5</b>    | <i>Pabpc1</i>    | P29341                  | 10                                                    |
|             | <i>Hspa8</i>     | P63017                  | 4                                                     |
|             | <i>Hnrnpm</i>    | Q9D0E1                  | 2                                                     |
|             | <i>Prmt5</i>     | Q8CIG8                  | 4                                                     |
|             | <i>Krt2</i>      | Q3TTY5                  | 2                                                     |
| <b>6</b>    | <i>Hnrnpl</i>    | Q8R081                  | 2                                                     |
|             | <i>Krt13</i>     | P08730                  | 3                                                     |
|             | <i>Prmt5</i>     | Q8CIG8                  | 3                                                     |
|             | <i>G3bp2</i>     | P97379                  | 2                                                     |
|             | <i>Ddx5</i>      | Q61656                  | 2                                                     |
| <b>7</b>    | <i>Rtcb</i>      | Q99LF4                  | 54                                                    |
| <b>8</b>    | <i>Fam98b</i>    | Q80VD1                  | 17                                                    |
|             | <i>Eif4a3</i>    | Q91VC3                  | 2                                                     |
|             | <i>Rbmxl1</i>    | O35479                  | 3                                                     |
|             | <i>Krt14</i>     | Q61781                  | 2                                                     |
|             | <i>Krt5</i>      | Q922U2                  | 3                                                     |
| <b>9</b>    | <i>Eif3i</i>     | Q9QZD9                  | 2                                                     |
| <b>10</b>   | <i>Rpl7a</i>     | P12970                  | 5                                                     |
|             | <i>Rps3a</i>     | P97351                  | 2                                                     |
|             | <i>Rpl8</i>      | P62918                  | 3                                                     |
|             | <i>Rps3</i>      | P62908                  | 2                                                     |
|             | <i>Rps2</i>      | P25444                  | 2                                                     |
|             | <i>Gemin2</i>    | Q9CQQ4                  | 2                                                     |
| <b>11</b>   | <i>Rtraf</i>     | Q9CQE8                  | 13                                                    |

**Supplementary Table S5. Generation of All-in-one cKO HT1080 cells**

| Screening                          | Target locus  | Clones analyzed | Targeted allele positive clones | Classification   |                        |           |           |
|------------------------------------|---------------|-----------------|---------------------------------|------------------|------------------------|-----------|-----------|
|                                    |               |                 |                                 | cKO <sup>a</sup> | F/mut (in-frame indel) | F/wt      | Misc.     |
| GFP <sup>+</sup> transfected cells | <i>DDXI</i>   | 24              | 24/24 (100%)                    | 23/24 (96%)      | 0/24 (0%)              | 1/24 (4%) | 0/24 (0%) |
|                                    | <i>HNRNPK</i> | 24              | 22/24 (92%)                     | 22/22 (100%)     | 0/22 (0%)              | 0/22 (0%) | 0/22 (0%) |

<sup>a</sup>, cKO includes F/F or F/mut with a frame-shift mutation, exon/intron disruption, an in-frame stop codon, or a large indel.
